# Supplementary material for: Aerobic Exercise Enhances Neurological Recovery after Ischemic Stroke via α-Tubulin Lactylation
Source: Research Square preprint supplement (doi:10.21203/rs.3.rs-8722886/v1), 2026-02-19
Supplement: Supplementary file 1 [file 0ceebfbdb6306d286b6ffb6a.docx]

**Supplementary figures**


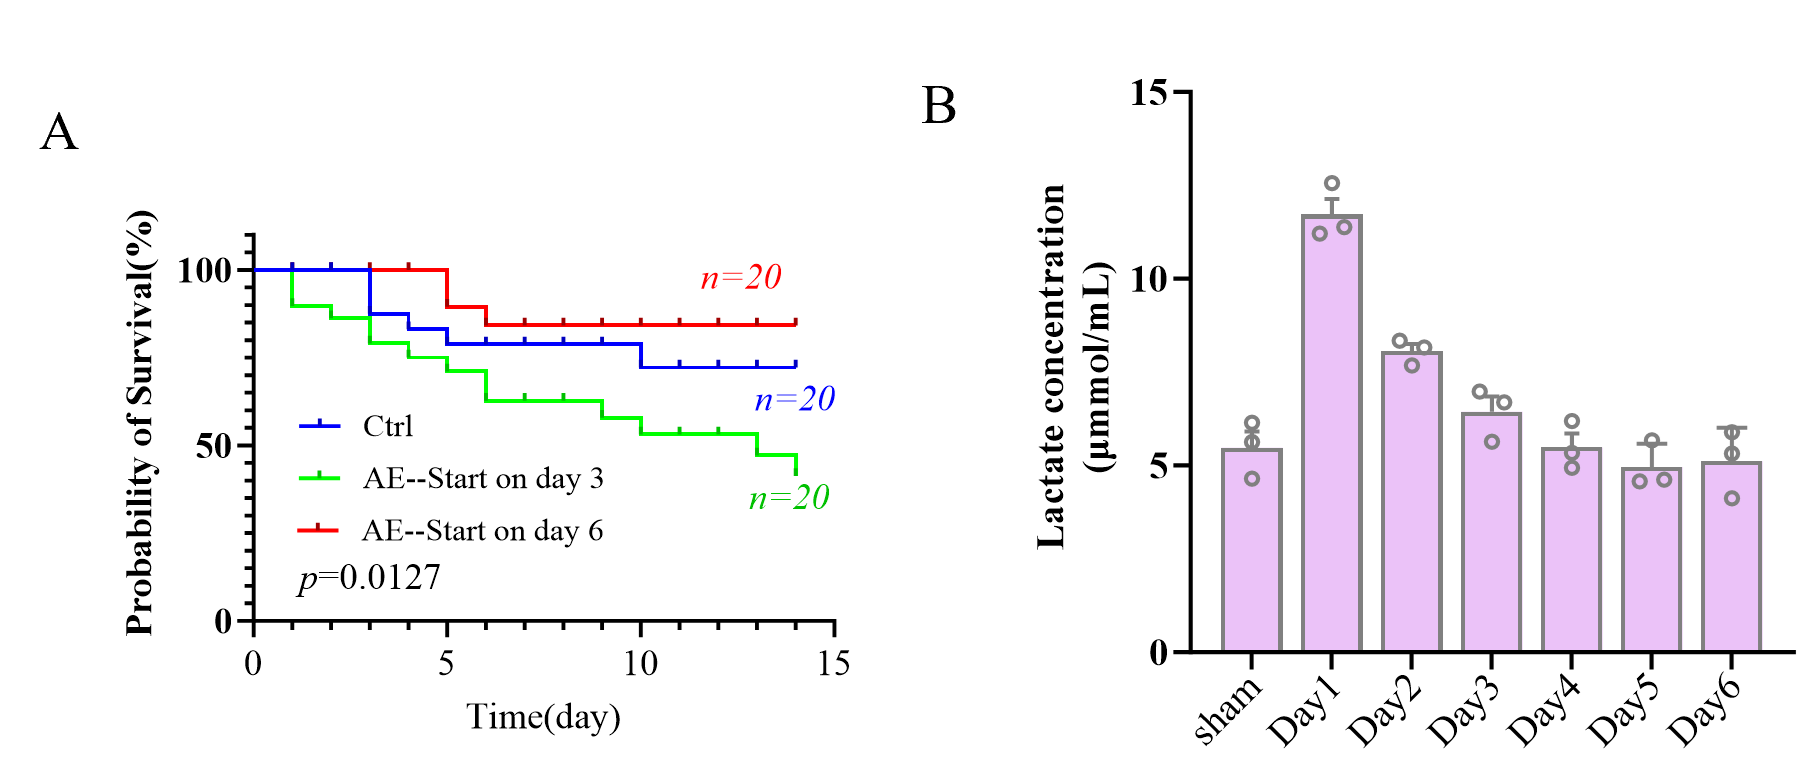


**Figure S1** Premature exercise following ischemia exacerbates brain injury.

**A** Mice that commenced aerobic exercise on the third day following ischemia stroke exhibited a lower survival rate than those that began exercise on the sixth day. **B** Changes in brain lactate levels in mice within one week following ischemia stroke. n=3 per group.


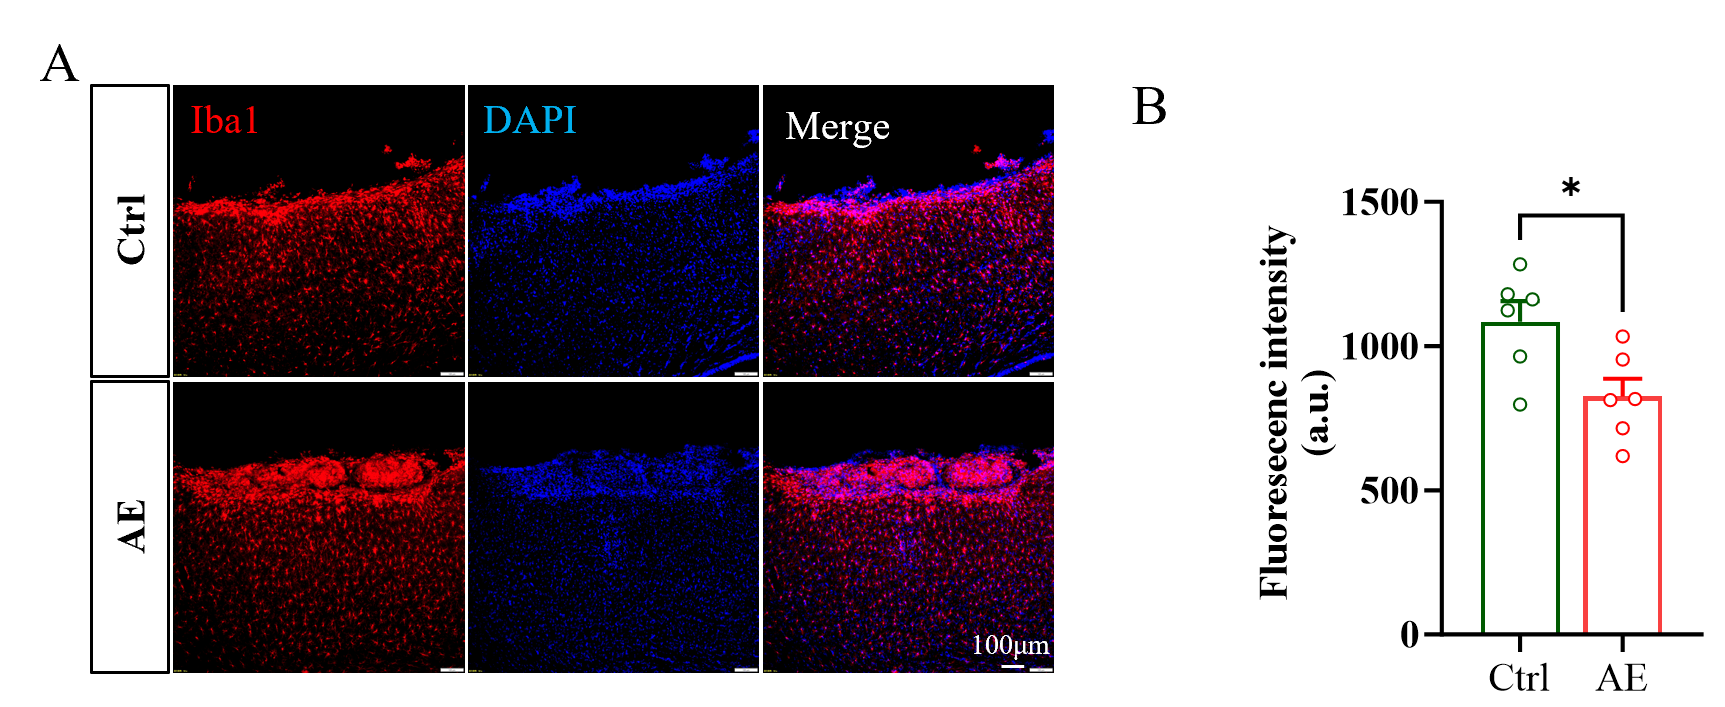


**Figure S2** Microglial morphology differed significantly in exercise/lactate groups vs control/DCA+AE groups in the ischemic penumbra, indicating attenuated inflammatory responses. Scale bar, 100 μm.


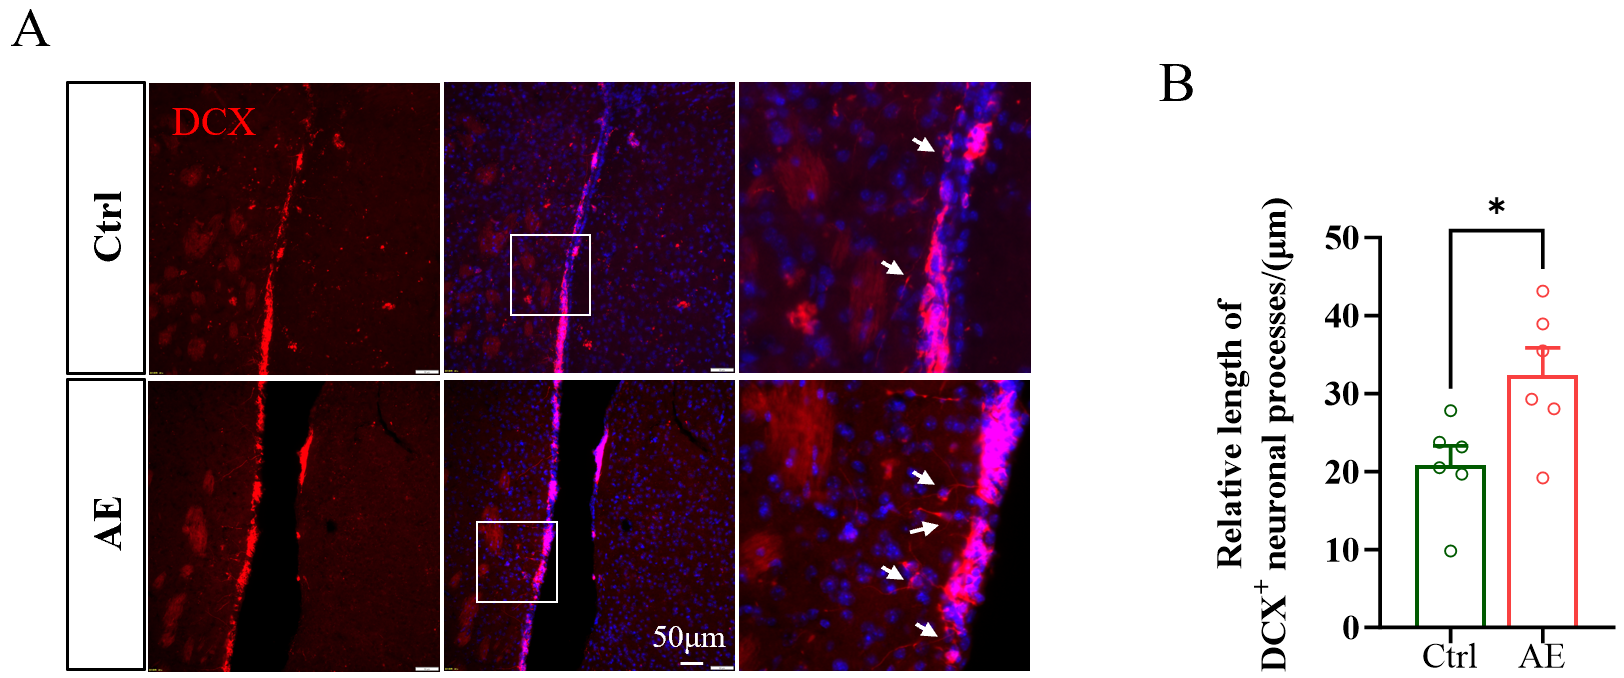


**Figure S3** The exercise group showed higher DCX expression and longer neurites in immature neurons than control in the SVZ. Scale bar, 50 μm
